# Supplementary material
Source: PubMed Central journal article supplement (PMC6598174)
Supplement: oc9b00055_si_001.pdf [file oc9b00055_si_001.pdf]

# Supplementary information for “Learning retrosynthetic planning through simulated experience”

John S. Schreck,<sup>\*,†</sup> Connor W. Coley,<sup>‡</sup> and Kyle J. M. Bishop<sup>\*,†</sup>

<sup>†</sup>*Department of Chemical Engineering, Columbia University, New York, NY 10027, USA*

<sup>‡</sup>*Department of Chemical Engineering, Massachusetts Institute of Technology, Cambridge, MA 02139, USA*

E-mail: [jsschreck@gmail.com](mailto:jsschreck@gmail.com); [kyle.bishop@columbia.edu](mailto:kyle.bishop@columbia.edu)

## Additional results

Table SI provides additional data for comparing the performance of the heuristic and learned policies. Figure S1 shows the full cost distribution for the heuristic policy ( $\pi_{sd}$ ) and the learned optimal policy ( $\pi_*$ ). Figure S2 shows additional data on the effect of noise  $\varepsilon$  on the performance of the heuristic policy.

Table SI: Comparison of the performance of  $\pi_{sd}$  versus  $\pi_*$ . The values show the percent that one policy found a lower cost than the other, or whether the two policies found pathways with identical cost (e.g., a tie), for the molecules in the training and testing sets. All percents were computed using the size of the training ( $\sim 100,000$ ) or testing set ( $\sim 25,000$ ).

|                          | <b>Train (100,00)</b> |             |         | <b>Test (25,000)</b> |             |         |
|--------------------------|-----------------------|-------------|---------|----------------------|-------------|---------|
|                          | $\pi_{sd}$ (%)        | $\pi_*$ (%) | Tie (%) | $\pi_{sd}$ (%)       | $\pi_*$ (%) | Tie (%) |
| $c_{tot} < P_1$          | 0.4                   | 35.0        | 47.9    | 6.1                  | 21.3        | 47.9    |
| $P_1 \leq c_{tot} < P_2$ | 3.9                   | 5.2         | 5.1     | 3.4                  | 8.6         | 9.9     |
| $c_{tot} \geq P_2$       | <1                    | 1.6         | <1      | <1                   | 1.1         | 1.3     |
| Bulk                     | 4.4                   | 41.8        | 53.8    | 9.9                  | 31.0        | 59.1    |

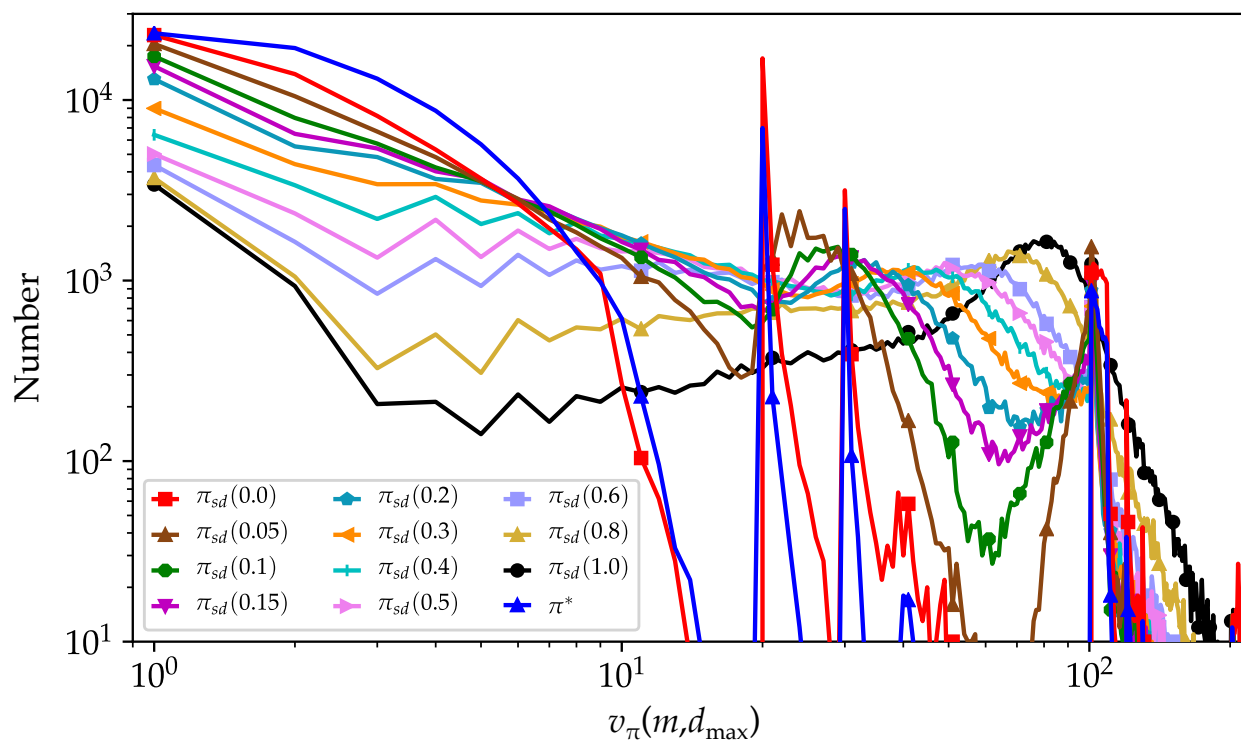

Figure S1: The distribution of expected costs  $v_\pi(m, d_{\max})$  over the set of 100,000 target molecules is shown for the greedy optimal policy  $\pi_*$  and the symmetric disconnection policy  $\pi_{sd}$  for different values of noise  $\epsilon$ .

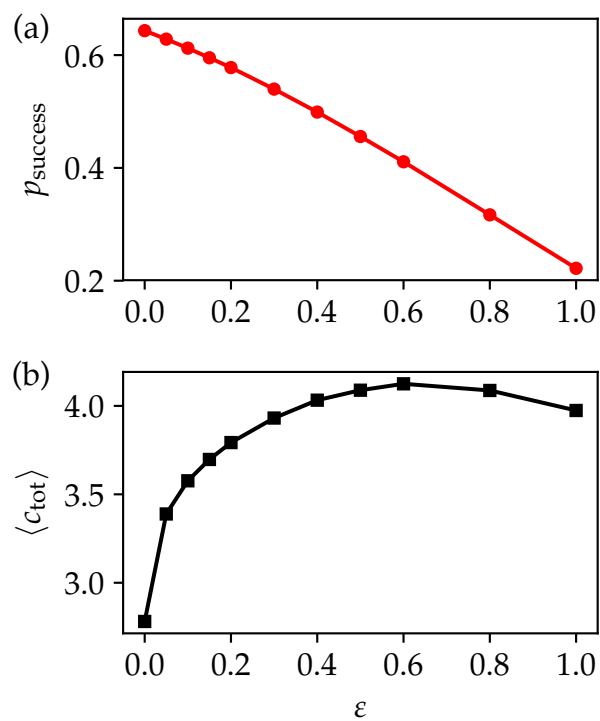

Figure S2: (a) The probability of successfully synthesizing the target molecule using the symmetric disconnection policy  $\pi_{sd}$  decreases with increasing noise  $\varepsilon$ . (b) For those successful syntheses, the average cost  $\langle c_{\text{tot}} \rangle$  increases with increasing noise  $\varepsilon$ .
